# Supplementary material for: Molecular Detection of a Potentially Toxic Diatom Species
Source: PubMed Central journal article supplement (PMC4454946; doi:10.3390/ijerph120504921), 2015-05-06
Supplement: ijerph-12-04921-s001.pdf [file ijerph-12-04921-s001.pdf]

# Molecular Detection of a Potentially Toxic Diatom Species

Figure S1. List of oligonucleotides spotted on the MicroAqua-array-01.

| MicroAqua-array-01<br>Probe Name |                      |               |               |
|----------------------------------|----------------------|---------------|---------------|
| POSITIVE_25_dT                   | NIT_VIT_Tag #19 (Fo) | CraHalEFas02  | CraHalSITs02  |
| AMP_COF_P29 (Fo)                 | NIT_VIT_Tag #19 (Re) | CraHalEFas03  | CraHalSITs03  |
| AMP_COF_P29 (Re)                 | PLE_LAE_Tag #2 (Fo)  | CycMenEFs01   | CraHalSITas01 |
| AMP_COF_P22 (Fo)                 | PLE_LAE_Tag #2 (Re)  | CycMenEFs02   | CraHalSITas02 |
| AMP_COF_P25 (Fo)                 | SUR_OVA_Tag #36 (Fo) | CycMenEFs03   | CraHalSITas03 |
| AMP_COF_P25 (Re)                 | SUR_OVA_Tag #36 (Re) | CycMenEFs04   | EolMinSITs01  |
| AMP_COF_P20 (Fo)                 | SUR_OVA_Tag #46 (Fo) | CycMenEFs05   | EolMinSITs02  |
| AMP_COF_P20 (Re)                 | SUR_OVA_Tag #46 (Re) | CycMenEFas01  | EolMinSITs03  |
| AMP_COF_P21 (Fo)                 | SUR_OVA_Tag #7 (Fo)  | MayPerEFs01   | EolMinSITs04  |
| AMP_COF_P21 (Re)                 | SUR_OVA_Tag #7 (Re)  | MayPerEFs02   | EolMinSITas01 |
| ACH_FLE_Tag #16 (Fo)             | SUR_OVA_Tag_probe#36 | MayPerEFs03   | EolMinSITas02 |
| ACH_FLE_Tag #16 (Re)             | CAL_BAC_Tag_probe#23 | MayPerEFas01  | MayPerSITs01  |
| ACH_FLE_Tag #5 (Fo)              | GOM_ANG_Tag_probe#20 | MayPerEFas02  | MayPerSITs02  |
| ACH_FLE_Tag #5 (Re)              | MEL_VAR_Tag_probe#56 | MayPerEFas03  | MayPerSITs03  |
| CAL_BAC_Tag #23 (Fo)             | SUR_OVA_Tag_probe#46 | NavVenEFs01   | MayPerSITs04  |
| CAL_BAC_Tag #23 (Re)             | ACH_FLE_Tag_probe#11 | NavVenEFs02   | MayPerSITas01 |
| GOM_ANG_Tag #8 (Fo)              | MEL_VAR_Tag_probe#41 | NavVenEFs03   | MayPerSITas02 |
| GOM_ANG_Tag #8 (Re)              | NIT_VIT_Tag_probe#67 | NavVenEFas01  | NavVenSITs01  |
| MEL_VAR_Tag #41 (Fo)             | NIT_VIT_Tag_probe#7  | NavVenEFas02  | NavVenSITs02  |
| MEL_VAR_Tag #41 (Re)             | NIT_VIT_Tag_probe#65 | NavVenEFas03  | NavVenSITs03  |
| MEL_VAR_Tag #54 (Fo)             | SUR_OVA_Tag_probe#7  | NitDisEFs01   | NavVenSITs04  |
| MEL_VAR_Tag #54 (Re)             | ACH_FLE_Tag_probe#16 | NitDisEFs02   | NavVenSITas01 |
| MEL_VAR_Tag #56 (Fo)             | NIT_VIT_Tag_probe#19 | NitDisEFs03   | NavVenSITas02 |
| MEL_VAR_Tag #56 (Re)             | GOM_ANG_Tag_probe#8  | NitDisEFs04   | NitDisSITs01  |
| NIT_COM_Tag #28 (Fo)             | NIT_COM_Tag_probe#28 | NitDisEFs05   | NitDisSITs02  |
| NIT_COM_Tag #28 (Re)             | ACH_FLE_Tag_probe#5  | NitDisEFas01  | NitDisSITs03  |
| NIT_COM_Tag #52 (Fo)             | MEL_VAR_Tag_probe#54 | NitPalEFs01   | NitDisSITs04  |
| NIT_COM_Tag #52 (Re)             | NIT_COM_Tag_probe#55 | NitPalEFs02   | NitDisSITs05  |
| NIT_COM_Tag #55 (Fo)             | AMP_COF_P20          | NitPalEFs03   | NitDisSITas01 |
| NIT_COM_Tag #55 (Re)             | AMP_COF_21           | NitPalEFs04   | NitPalSITs01  |
| NIT_DIS_P24 (Fo)                 | AMP_COF_22           | NitPalEFs05   | NitPalSITs02  |
| NIT_DIS_P24 (Re)                 | AMP_COF_25           | NitPalEFas01  | NitPalSITs03  |
| NIT_DIS_P27 (Fo)                 | AMP_COF_29           | SurAngEFs01   | NitPalSITs04  |
| NIT_DIS_P27 (Re)                 | NIT_SIG_P21          | SurAngEFs02   | NitPalSITs05  |
| NIT_SIG_P21 (Fo)                 | NIT_SIG_P26          | SurAngEFs03   | NitPalSITs06  |
| NIT_SIG_P21 (Re)                 | AmpCofEFs01          | SurAngEFas01  | SurAngSITs01  |
| NIT_SIG_P26 (Fo)                 | AmpCofEFs02          | SurAngEFas02  | SurAngSITs02  |
| NIT_SIG_P26 (Re)                 | AmpCofEFs03          | SurAngEFas03  | SurAngSITs03  |
| NIT_VIT_Tag #7 (Fo)              | AmpCofEFas01         | AmpCofSITs01  | SurAngSITs04  |
| NIT_VIT_Tag #7 (Re)              | AmpCofEFas02         | AmpCofSITs02  | SurAngSITs05  |
| NIT_VIT_Tag #65 (Fo)             | AmpCofEFas03         | AmpCofSITs03  | SurAngSITas01 |
| NIT_VIT_Tag #65 (Re)             | CraHalEFs01          | AmpCofSITs04  |               |
| NIT_VIT_Tag #67 (Fo)             | CraHalEFs02          | AmpCofSITs05  |               |
| NIT_VIT_Tag #67 (Re)             | CraHalEFs03          | AmpCofSITas01 |               |
| NIT_VIT_Tag #67 (Re)             | CraHalEFas01         | CraHalSITs01  |               |

Figure S2. List of oligonucleotides spotted on the MicroAqua-array-02.

| MicroAqua-array-02<br>Probe Name           |                                                         |                                          |
|--------------------------------------------|---------------------------------------------------------|------------------------------------------|
| Cy3-Marker                                 | NitDisSITas03/AmpCofSITas03                             | NitDisTag67F                             |
| Buffer                                     | SurAngEFs05                                             | NitDisTag7R                              |
| Empty                                      | DunGS05_25_dT_dT_12.5 $\frac{1}{2}$ M                   | SurAngEFs01/NitDisEFs16/<br>NavVenEFas01 |
| AmpCofTag7F                                | NitDisTag23F                                            | NitPalEFas04/NavVenEFas04                |
| AmpCofTag25                                | NitVitTag27F                                            | AmpCofTag09                              |
| NitPalEFas02/NavVenEFas07                  | AmpCofEFas03                                            | CIBacNavSSEFs04                          |
| SurAngEFas03/AmpCofEFas10                  | CycMenEFs03                                             | CraHalSITs05                             |
| OrRaphexNaviculalesSITs02                  | EolMinSITas01                                           | OrNavNavSSEFas02/NitPalEFs06             |
| AmpCofSITas08                              | AmpCofSITs06                                            | NitDisEFs03/MayPerEFs02                  |
| CIBacNavSSEFs09                            | CIBacNavSSEFs010                                        | NitPalEFs03                              |
| NavVenSITas07                              | NavVenSITas03/CraHalSITs01                              | CIBacNavSSEFs01                          |
| NitDisSITs08/AmpCofSITas09                 | NitDisSITas02/AmpCofSITas02                             | euk 1209                                 |
| SurAngEFas07                               | SurAngEFs04                                             | AmpCofTag29R                             |
| Lambda                                     | DunGS05_25_dT_dT_25 $\frac{1}{2}$ M                     | AmpCofP29Tag54R                          |
| AmpCofP20Tag41F                            | NitPalTag36F                                            | AmpCof29Tag                              |
| NitVitTag7R                                | NitVitTag7                                              | CraHalSITs04                             |
| NavVenEFas05/SurAngEFas02/<br>AmpCofEFas09 | NavVenEFas02/NitDisEFas15                               | OrNavNavSSEFas01/NitPalEFs05             |
| MayPerEFas03/NitDisEFas14                  | NitPalEFas01/NavVenEFas08                               | NitDisEFs02/MayPerEFs01                  |
| EolMinSITas02                              | NitPalSITas11                                           | NitPalEFs02                              |
| AmpCofSITas07                              | CIBacNavSSEFs06                                         | NavVenSITs02/CraHalSITs09                |
| CIBacNavSSEFs08                            | CraHalSITas06                                           | euk 328                                  |
| NavVenSITas06                              | OrNavNavSSEFs02                                         |                                          |
| NitDisSITs07/AmpCofSITs03                  | NitDisEFas08/SurAngEFas06/<br>AchMinEFas02/MayPerEFas06 |                                          |
| SurAngEFas05/AchMinEFas05/<br>NitPalEFas10 | NitPalEFas08                                            |                                          |
| POSITIVE_25_dT_12.5 $\frac{1}{2}$ M        | CIBacNavSSEFs03                                         |                                          |
| NitDisTag46R                               | DunGS05_25_dT_dT_50 $\frac{1}{2}$ M                     |                                          |
| AmpCofTagP29                               | AmpCofTag5R                                             |                                          |
| NitDisEFas04/CraHalEFas05                  | AmpCofEFas02                                            |                                          |
| NavVenEFas05/SurAngEFas02/<br>AmpCofEFas09 | CycMenEFs02                                             |                                          |
| NitVitSIT01                                | NavVenSITas10                                           |                                          |
| AmpCofSITas06                              | NavVenSITs01/CraHalSITas08                              |                                          |
| CIBacNavSSEFs03                            | CraHalSITas05                                           |                                          |
| NavVenSITas05                              | OrNavNavSSEFs01                                         |                                          |
| NitDisSITs06/AmpCofSITas05                 | NitDisEFas07/SurAngEFs01/<br>AchMinEFas03/MayPerEFas05  |                                          |
| SurAngEFas04/AchMinEFas04/<br>NitPalEFas09 | NitPalEFas07                                            |                                          |
| POSITIVE_25_dT_25 $\frac{1}{2}$ M          | DunGS02_25_dT_dT_12.5 $\frac{1}{2}$ M                   |                                          |
| CraHalTag23R                               | NitDisTag67R                                            |                                          |
| AmpCofP20Tag221R                           | NitPalTag23                                             |                                          |
| CraHalEFs02/NavVenEFs07                    | NavVenEFas09/AmpCofEFas01/<br>CraHalEFas01              |                                          |
| MayPerEFas02/NitDisEFas13                  | NitPalEFas05/AmpCofEFas11                               |                                          |
| EolMinSITs02                               | OrRaphSITs01                                            |                                          |
| AmpCofSITs08                               | CIBacNavSSEFs05                                         |                                          |
| CIBacNavSSEFs012                           | CraHalSITas04                                           |                                          |
| NavVenSITs05                               | CIBacNavSSEFs013                                        |                                          |
| NitDisSITas04/AmpCofSITas04                | NitDisEFas06/AchMinEFas01/<br>MayPerEFas04              |                                          |
| SurAngEFs06                                | NitPalEFas06                                            |                                          |
| POSITIVE_25_dT_50 $\frac{1}{2}$ M          | CIBacNavSSEFs02                                         |                                          |
| AmpCofTag46F                               | DunGS02_25_dT_dT_25 $\frac{1}{2}$ M                     |                                          |
| NavVenTag55                                | AmpCofP20F                                              |                                          |
| NavVenEFas03                               | AmpCofTag                                               |                                          |
| SurAngEFs01/NitDisEFs16/<br>NavVenEFas01   | CycMenEFs01                                             |                                          |
| AmpCofTag10                                | NavVenSITas09                                           |                                          |
| AmpCofSITs07                               | CraHalSITs06                                            |                                          |
| CIBacNavSSEFs011                           | OrNavNavSSEFas03/NitPalEFs07                            |                                          |
| NavVenSITs04/CraHalSITs02                  | NitDisEFs04/MayPerEFs03                                 |                                          |
|                                            | NitPalEFs04                                             |                                          |
|                                            | DunGS02_25_dT_dT_50 $\frac{1}{2}$ M                     |                                          |

**Table S1.** Sequences of oligonucleotide probes spotted on microarray slides, recognizing *Amphora coffeaeformis* marker genes.

| Marker Gene                         | Probe Name       | Probe Sequence 5' → 3'      |                                        |
|-------------------------------------|------------------|-----------------------------|----------------------------------------|
| Elongation Factor gene (eEF1-a)     | Sense strand     | AmpCofEFs01                 | GTTGACCTTCTCATCCTTGGCAATACC            |
|                                     |                  | AmpCofEFs02                 | GGTATTGCCAAGGATGAGAAGGTCAAC            |
|                                     |                  | AmpCofEFs03                 | GACCAACGGAGTTACCGGGTCCGGCGG            |
|                                     | Antisense strand | AmpCofEFas01                | GGTTGACCTTCTCATCCTTGGCAATACC           |
|                                     |                  | AmpCofEFas02                | GGCTTGAGGACACCGGGGTGCTCCTGA            |
|                                     |                  | AmpCofEFas03                | GTCATCTTGCAGGCAACCTTGGCGGTAC           |
| Silicic Acid Transporter gene (SIT) | Sense strand     | AmpCofSITs06                | GCTGTCACTCTTGCTGCCATCTTTGATGATA        |
|                                     |                  | AmpCofSITs07                | CCCCATTGCCTCTGTTCTCTTGTGCTCTT          |
|                                     |                  | AmpCofSITs08                | GGTCATTATTGGTATGTTGGAAGGTATGCAAATTGCGT |
|                                     |                  | NitDisSITs07/AmpCofSITs03   | AATCTCTTCTTCTGGGGACGATGCCTCTTCTCT      |
|                                     | Antisense strand | AmpCofSITas06               | AGAACAGAGGCAATGGGGGGAACACCATCCC        |
|                                     |                  | AmpCofSITas07               | GAACACCATCCCAGACGGCAGTCTTATCATCA       |
|                                     |                  | AmpCofSITas08               | CCATGAAAAAGAGCAACAAGAGAACAGAGGCAAT     |
|                                     |                  | NitDisSITas02/AmpCofSITas02 | GCAAAAGCACACGACGGCGAAAGAGAAG           |
|                                     |                  | NitDisSITas03/AmpCofSITas03 | AGAAGAAGAGATTGGCCACGGCACTGC            |
|                                     |                  | NitDisSITas04/AmpCofSITas04 | AAGACAATTCCCTTGGGGATTCCCTCCCA          |
|                                     |                  | NitDisSITas06/AmpCofSITas05 | CACCATGAGCACTCTTCAACGAACAAACCAC        |
|                                     |                  | NitDisSITas08/AmpCofSITas09 | GCTGTTGCCAAGATCCGCGAGTCGGAA            |

Colour code of oligonucleotide probes:

|                               |
|-------------------------------|
| Species-specific probe        |
| Probe recognizing two species |

© 2015 by the authors; licensee MDPI, Basel, Switzerland. This article is an open access article distributed under the terms and conditions of the Creative Commons Attribution license (<http://creativecommons.org/licenses/by/4.0/>).
